# Supplementary material for: Silver nanoparticle-loaded microgel-based etalons for H2O2sensing
Source: Royal Society of Chemistry journal article supplement (doi:10.1039/c8ra02215a), 2018-01-01
Supplement: c8ra02215a1.pdf [file c8ra02215a1.pdf]

## Supporting Information

### Silver Nanoparticle-Loaded Microgel-Based Etalons for H<sub>2</sub>O<sub>2</sub> Sensing

Tong Shu,<sup>a,b</sup> Qiming Shen,<sup>b</sup> Yu Wan,<sup>b</sup> Wei Zhang,<sup>b</sup> Lei Su,<sup>a</sup> Xueji Zhang<sup>a</sup> and  
Michael J. Serpe<sup>\*b</sup>

<sup>a</sup> Beijing Advanced Innovation Center of Materials Genome Engineering, Beijing Key Laboratory for Bioengineering and Sensing Technology, Research Center for Bioengineering and Sensing Technology, University of Science and Technology Beijing, Beijing 100083, P. R. China;

<sup>b</sup>Department of Chemistry, University of Alberta, Edmonton, Alberta, Canada.

Department of Chemistry, University of Alberta, Edmonton, Alberta, Canada T6G

2G2. E-mail: michael.serpe@ualberta.ca;

Fax: +1 780 492 8231; Tel: +1 780 492 5778

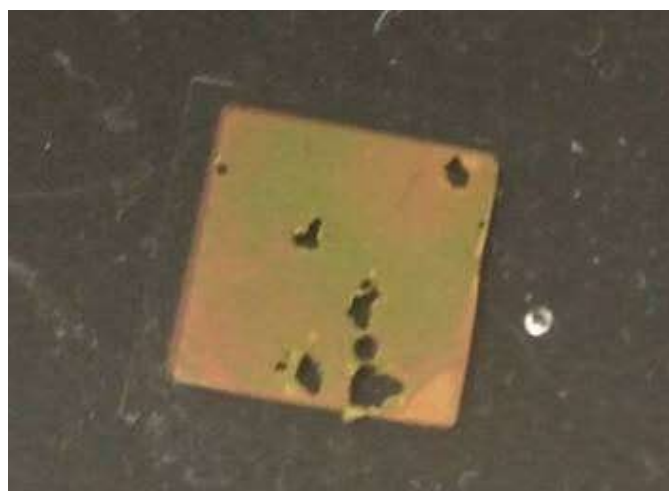

**Figure S1.** Photograph of an etalon made via the in situ synthesis of AgNPs in the etalon at room temperature.

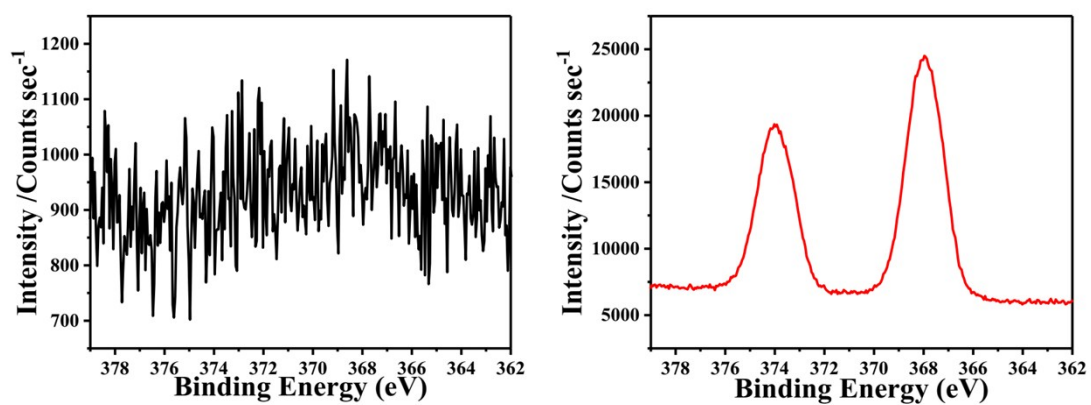

**Figure S2.** X-ray photoelectron spectroscopy spectrum of pNIPAm-co-AAc microgels (left) before and after incorporating the AgNPs (right).

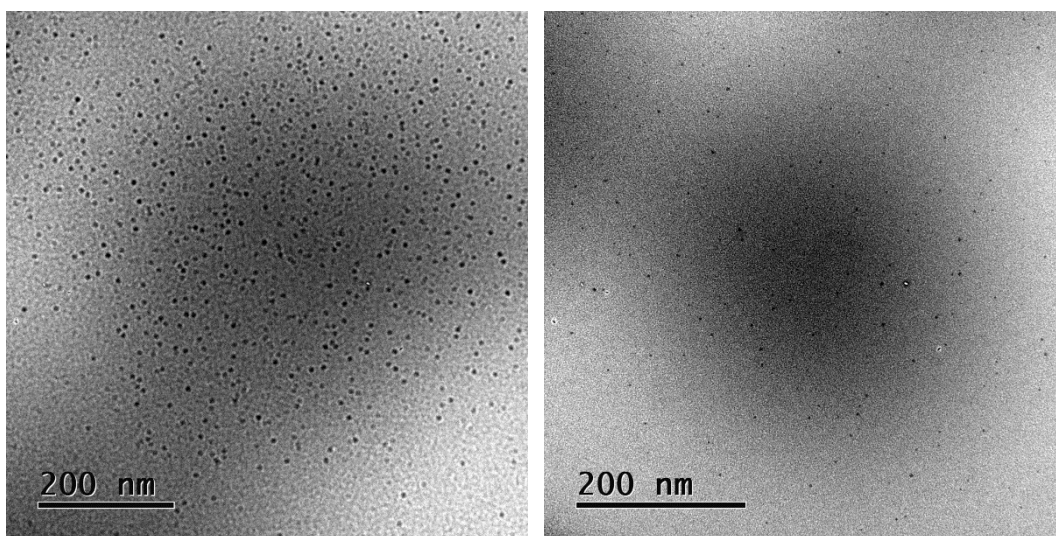

**Figure S3.** TEM images of the AgNPs incorporated microgels (left) before and (right) after treating with 6 mM H<sub>2</sub>O<sub>2</sub>.

**Table S1.** A partial list of H<sub>2</sub>O<sub>2</sub> sensors

| <b>Materials</b>                            | <b>Linear range (mM)</b> | <b>Reference</b> |
|---------------------------------------------|--------------------------|------------------|
| Graphene wrapped Cu <sub>2</sub> O nanocube | 0.3-3                    | 1                |
| Fe <sub>2</sub> O <sub>3</sub> /graphite    | 0.2-5.5                  | 2                |
| rGO/Fe <sub>3</sub> O <sub>4</sub>          | 0.1-6                    | 3                |
| Graphene nanosheets                         | 1-20                     | 4                |
| boron-doped graphene nanosheets             | 1-20                     | 4                |
| Ferrocene-Modified Microgels                | 0.6-35                   | 5                |
| AgNPs-incorporated microgels                | 0.5-6                    | This work        |

**References**

- 1 M. Liu, R. Liu and W. Chen, *Biosens. Bioelectron.*, 2013, **45**, 206.
- 2 B. Šljukić, C. E. Banks, A. Crossley and R. G. Compton, *Electroanal.*, 2006, **18**, 1757.
- 3 Y. P. Ye, T. Kong, X. F. Yu, Y. K. Wu, K. Zhang and X. P. Wang, *Talanta*, 2012, **89**, 417.
- 4 M. H. Yeh, Y. S. Li, G. L. Chen, L. Y. Lin, T. J. Li, H. M. Chuang, C. Y. Hsieh, S. C. Lo, W. H. Chiang and K. C. Hoa, *Electrochim. Acta*, 2015, **172**, 52.
- 5 Q. M. Zhang, D. Berg, J. Duan, S. M. Mugo and M. J. Serpe, *ACS Appl. Mater. Inter.*, 2016, **8**, 27264.
